# Supplementary material for: Widely contrasting outcomes from the use of tris(pentafluorophenyl)bismuth or pentafluorophenylsilver as oxidants in the reactions of lanthanoid metals with N,N′-diarylformamidines
Source: Royal Society of Chemistry journal article supplement (doi:10.1039/d0dt03044a), 2020-01-01
Supplement: d0dt03044a1.pdf [file d0dt03044a1.pdf]

## SUPPLEMENTARY INFORMATION

### **Widely contrasting outcomes from the use of tris(pentafluorophenyl)bismuth or pentafluorophenylsilver as oxidants in the reactions of lanthanoid metals with N,N'-diarylfornamidines**

Zhifang Guo,<sup>a</sup> Victoria Blair,<sup>a</sup> Glen B. Deacon,<sup>a</sup> and Peter C. Junk<sup>b\*</sup>

<sup>a</sup>School of Chemistry, Monash University, Clayton 3800, Australia.

<sup>b</sup>College of Science, Technology & Engineering, James Cook University, Townsville 4811, Qld, Australia.

\*Corresponding authors: glen.deacon@monash.edu; peter.junk@jcu.edu.au

#### Contents

1. <sup>1</sup>H and <sup>19</sup>F NMR Spectra for complexes
2. X-ray crystallography
3. References

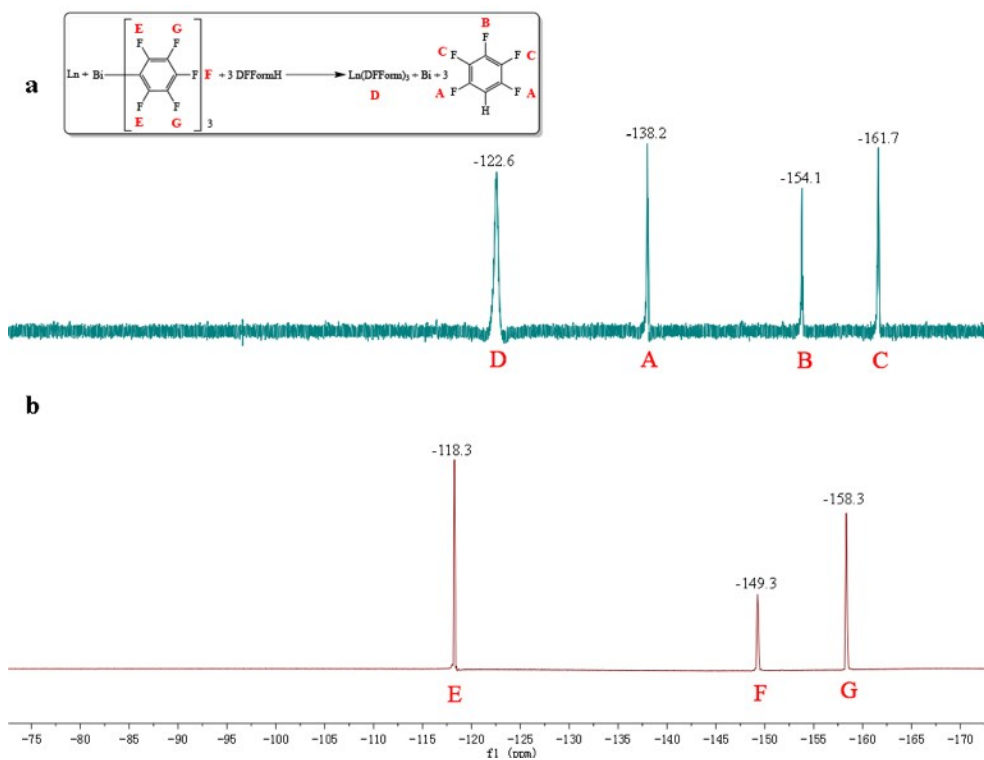

**Figure S1.** Typical  $^{19}\text{F}\{^1\text{H}\}$  NMR spectra of (a) the reaction mixture after formation of  $[\text{Ho}(\text{DFForm})_3(\text{thf})]$  (**5**) (representative of **1-10**); (b)  $\text{Bi}(\text{C}_6\text{F}_5)_3$

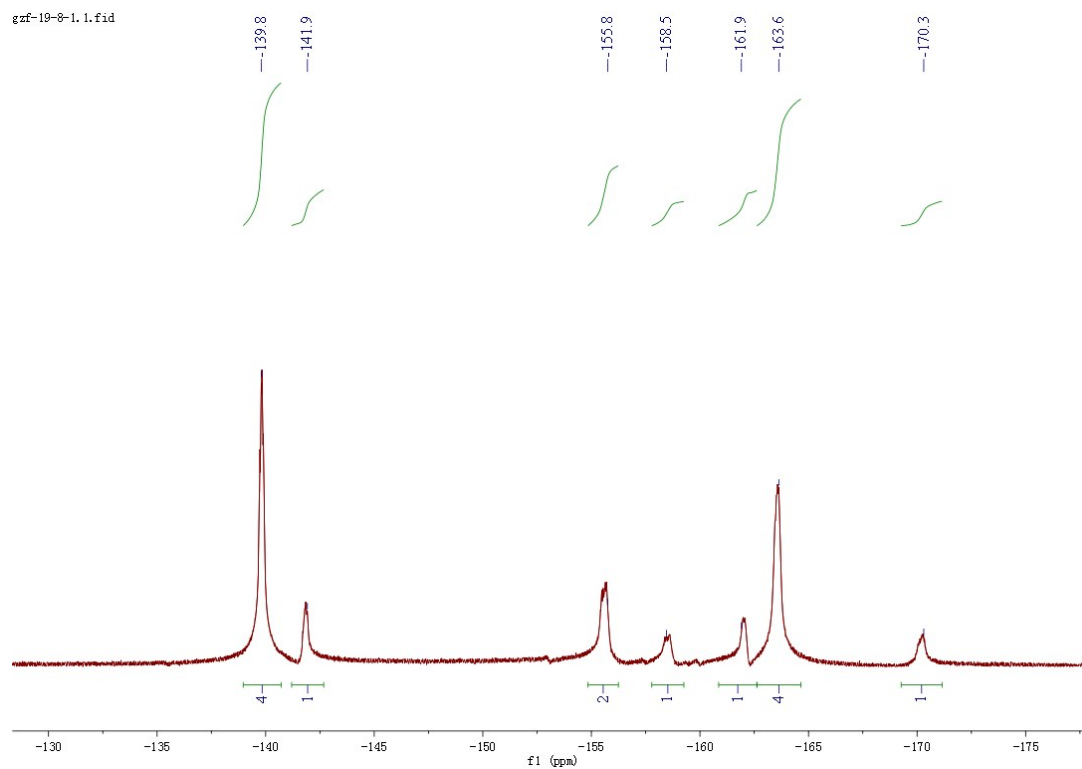

**Figure S2.**  $^{19}\text{F}\{^1\text{H}\}$  NMR spectra of the reaction mixture after formation of  $[\text{Nd}(\text{DippForm})_2\text{F}(\text{thf})_2]$  **12** and  $o\text{-HC}_6\text{F}_4\text{O}(\text{CH}_2)_4\text{DippForm}$  in  $\text{C}_6\text{D}_6$

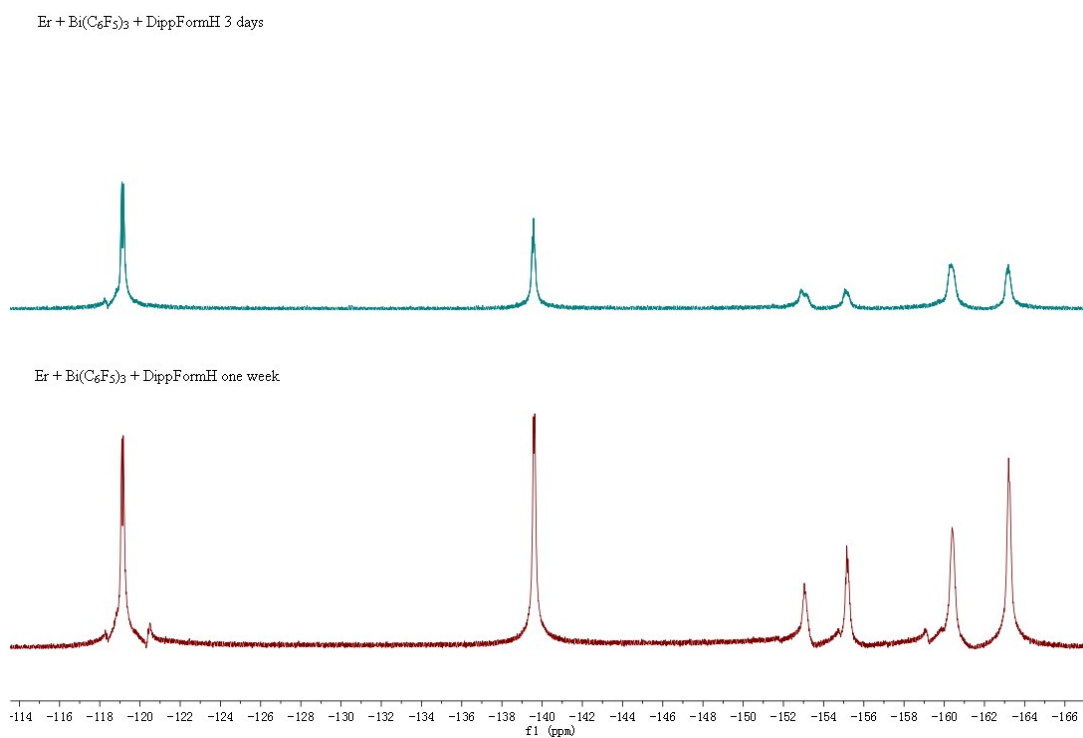

**Figure S3.**  $^{19}\text{F}\{^1\text{H}\}$  NMR spectra of the reaction mixture of Er + Bi(C<sub>6</sub>F<sub>5</sub>)<sub>3</sub> + DippFormH after 3 days and 7 days

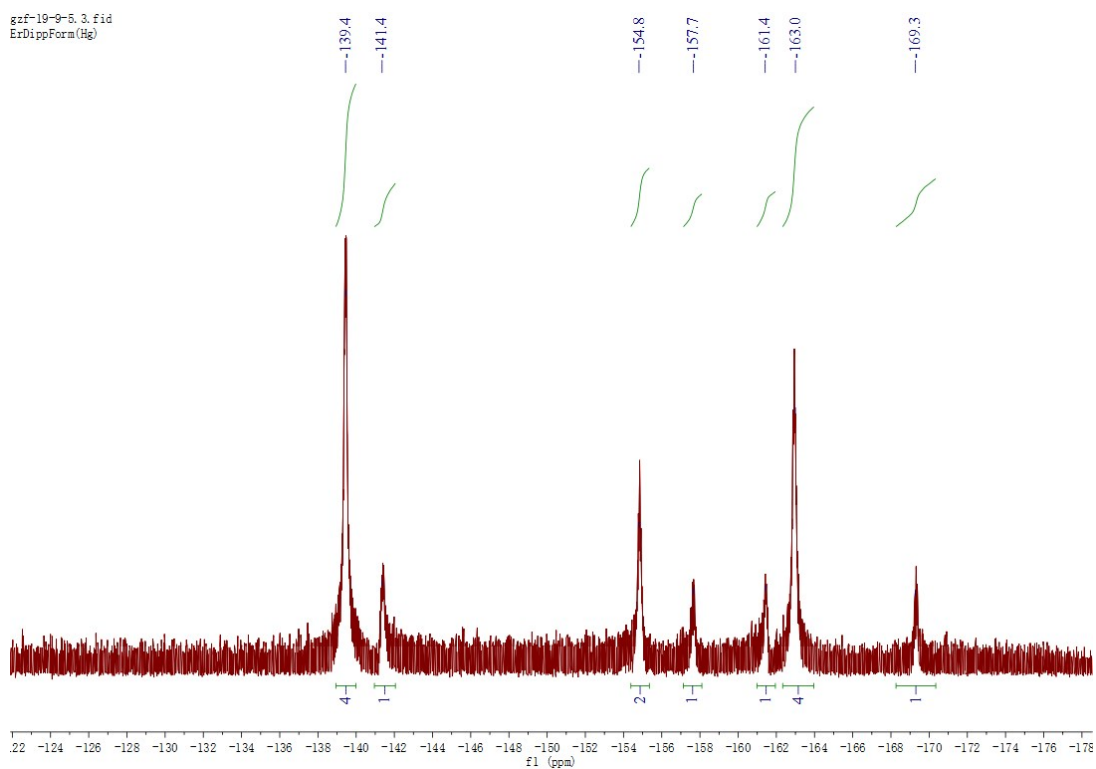

**Figure S4.**  $^{19}\text{F}\{^1\text{H}\}$  NMR spectra of the reaction mixture after formation of  $[\text{Er}(\text{DippForm})_2\text{F}(\text{thf})]$  **13** and *o*- $\text{HC}_6\text{F}_4\text{O}(\text{CH}_2)_4\text{DippForm}$  in  $\text{C}_6\text{D}_6$

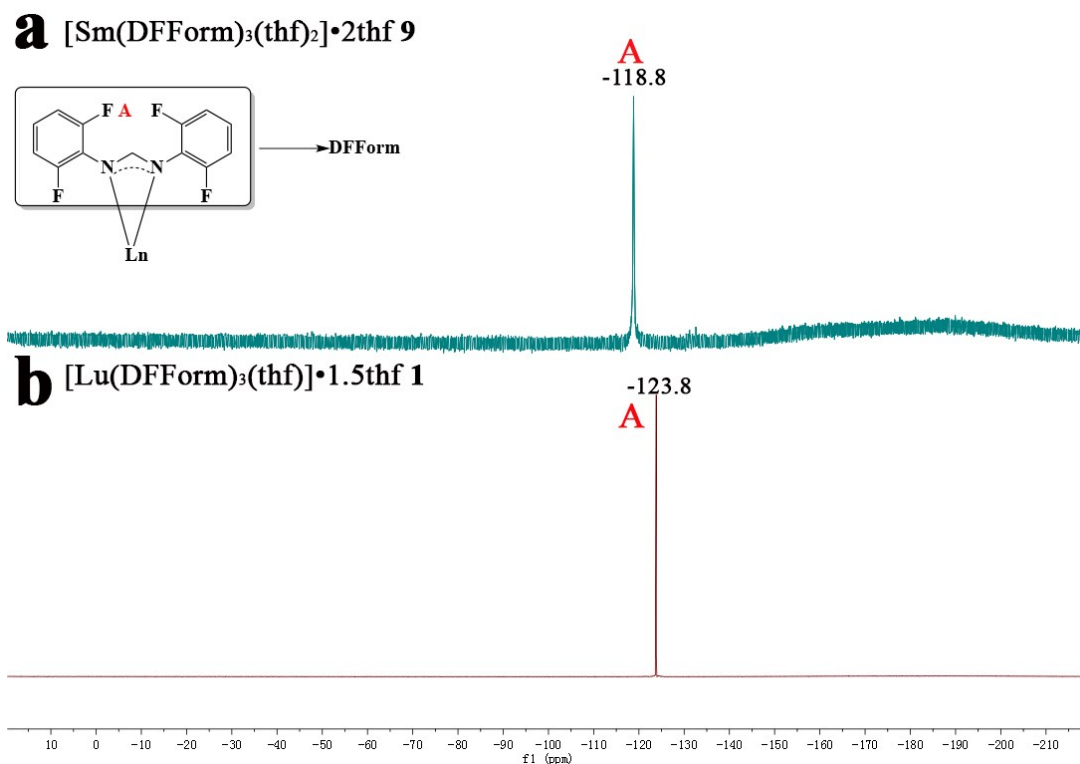

**Figure S5.**  $^{19}\text{F}\{^1\text{H}\}$  NMR spectra of  $[\text{Sm}(\text{DFForm})_3(\text{thf})_2]\cdot 2\text{thf}$  **9** (a) and  $[\text{Lu}(\text{DFForm})_3(\text{thf})]\cdot 1.5\text{thf}$  **1** (b) in  $\text{C}_6\text{D}_6$

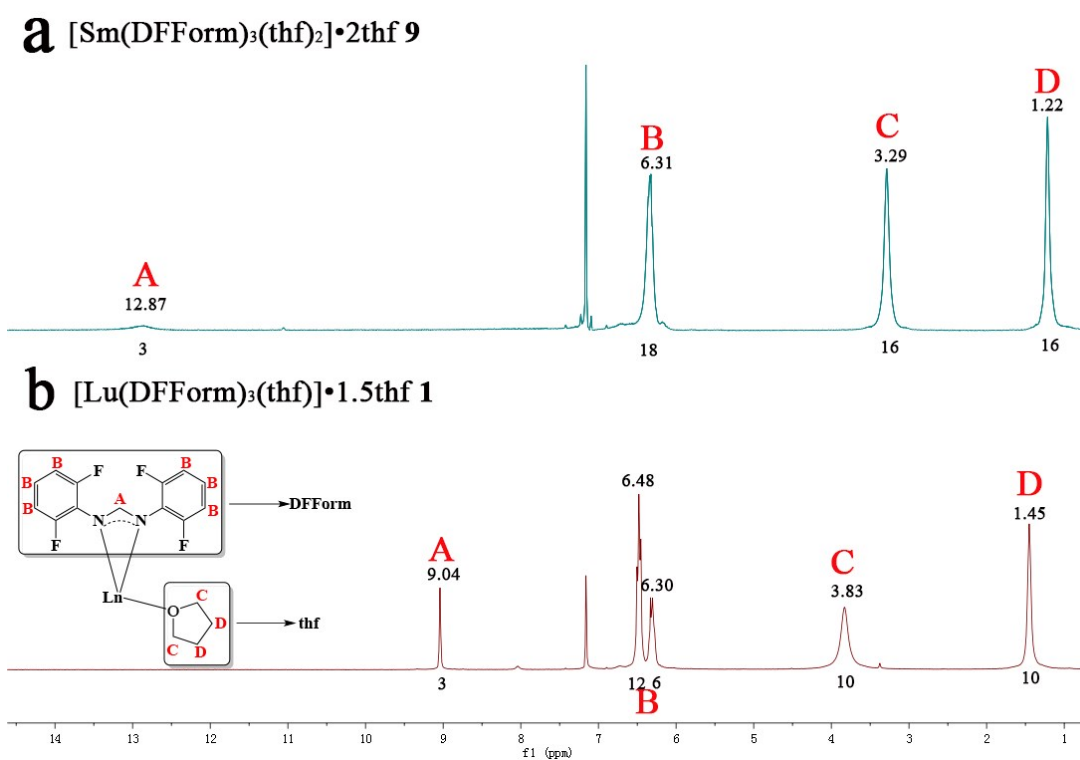

**Figure S6.**  $^1\text{H}$  NMR spectra of  $[\text{Sm}(\text{DFForm})_3(\text{thf})_2]\cdot 2\text{thf}$  **9** (a) and  $[\text{Lu}(\text{DFForm})_3(\text{thf})]\cdot 1.5\text{thf}$  **1** (b) in  $\text{C}_6\text{D}_6$

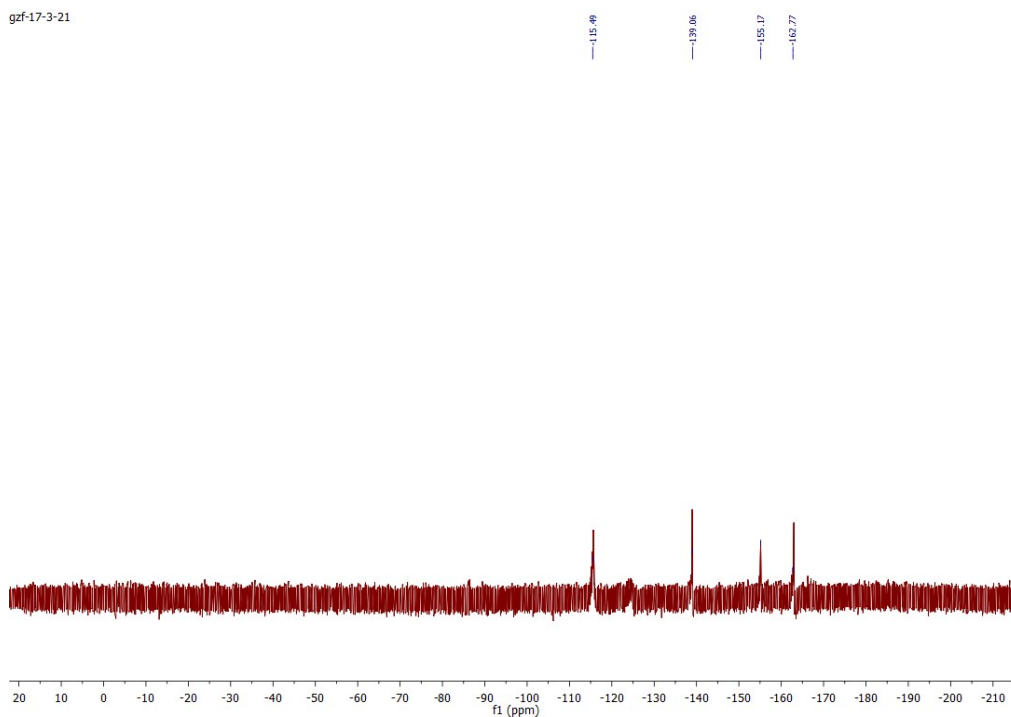

**Figure S7.**  $^{19}\text{F}\{^1\text{H}\}$  NMR spectra of the reaction mixture of  $\text{Yb} + \text{AgC}_6\text{F}_5 + \text{DFFormH}$  in thf

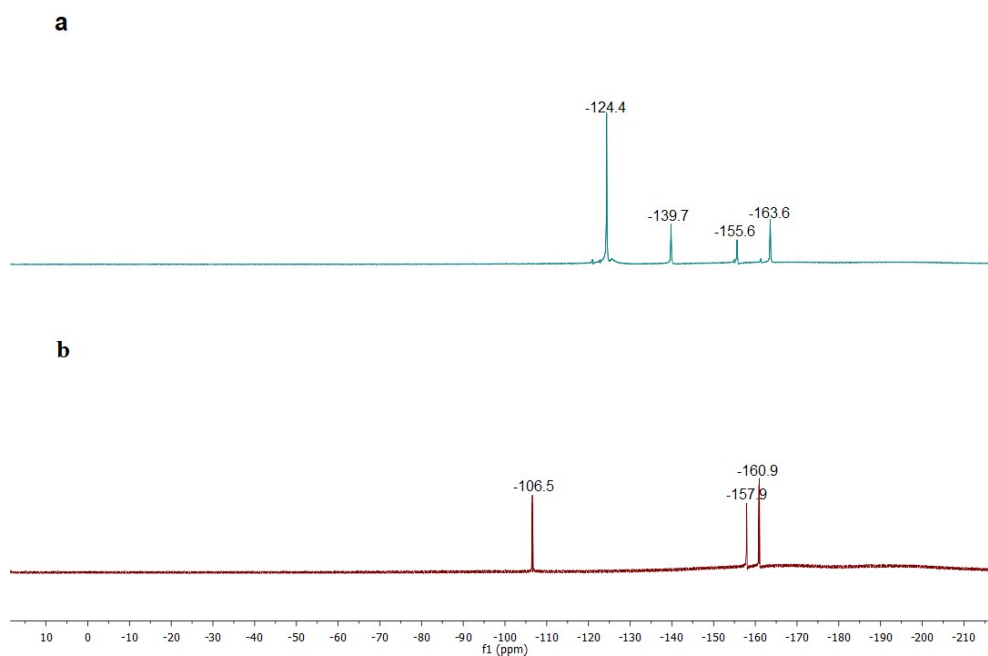

**Figure S8.**  $^{19}\text{F}\{^1\text{H}\}$  NMR spectra of the reaction mixture of  $\text{Er} + \text{I}_2 + \text{AgC}_6\text{F}_5 + \text{DFFormH}$  stirring for 1h (a); b  $\text{AgC}_6\text{F}_5$  (b)

### Selected bond angles (°) and lengths (Å) for 2-5, 7, 8, and 10

**2 Yb** Yb-N(1) 2.409(4), Yb-N(2) 2.361(4), Yb-N(3) 2.367(4), Yb-N(4) 2.411(4), Yb-N(5) 2.362(4), Yb-N(6) 2.400(4), Yb-O(1) 2.311(3), C7-Yb-O1 118.94(14), C20-Yb-O1 102.03(13), C33-Yb-O1 84.79(14), C7-Yb-C20 96.92(14), C7-Yb-C33 116.66(14), C20-Yb-C33 137.32(14); **3 Tm**-N(1) 2.388(3), Tm-N(2) 2.357(3), Tm-N(3) 2.395(3), Tm-N(4) 2.372(3), Tm-N(5) 2.388(3), Tm-N(6) 2.352(3), Tm-O(1) 2.319(3), C7-Tm-O1 132.10(10), C20-Tm-O1 93.66(10), C33-Tm-O1 90.85(10), C7-Tm-C20 105.80(11), C7-Tm-C33 101.87(10), C20-Tm-C33 137.70(10); **4 Er1** Er-N(1) 2.389(4), Er-N(2) 2.409(4), Er-N(3) 2.386(4), Er-N(4) 2.371(4), Er-N(5) 2.423(4), Er-N(6) 2.366(4), Er-O(1) 2.332(4), C7-Er-O1 133.54(15), C20-Er-O1 90.99(14), C33-Er-O1 88.83(14), C7-Er-C20 98.99(15), C7-Er-C33 108.63(15), C20-Er-C33 141.67(16); **4 Er2** Er-N(1) 2.423(4), Er-N(2) 2.361(4), Er-N(3) 2.421(4), Er-N(4) 2.398(5), Er-N(5) 2.349(5), Er-N(6) 2.384(4), Er-O(1) 2.332(4), C7-Er-O1 142.06(14), C20-Er-O1 89.63(15), C33-Er-O1 88.56(15), C7-Er-C20 102.28(16), C7-Er-C33 105.28(16), C20-Er-C33 136.83(16); **5 Ho**-N(1) 2.371(5), Ho-N(2) 2.397(4), Ho-N(3) 2.372(5), Ho-N(4) 2.390(5), Ho-N(5) 2.418(5), Ho-N(6) 2.401(5), Ho-O(1) 2.328(4), C7-Ho-O1 132.33(16), C20-Ho-O1 93.33(15), C33-Ho-O1 91.12(16), C7-Ho-C20 106.66(17), C7-Ho-C33 101.07(17), C20-Ho-C33 137.48(16)

**7 Tb2** Tb-N(1) 2.474(3), Tb-N(2) 2.558(3), Tb-N(3) 2.452(3), Tb-N(4) 2.527(3), Tb-N(5) 2.519(3), Tb-N(6) 2.454(3), Tb-O(1) 2.415(3), Tb-O(2) 2.404(3), O1-Tb-O2 151.24(10), C7-Tb-C20 136.56(12), C7-Tb-C33 104.25(11), C20-Tb-C33 119.16(12); **8 Gd2** Gd-N(1) 2.483(4), Gd-N(2) 2.518(4), Gd-N(3) 2.516(4), Gd-N(4) 2.526(4), Gd-N(5) 2.590(4), Gd-N(6) 2.474(4), Gd-O(1) 2.440(3), Gd-O(2) 2.419(3), O1-Gd-O2 144.35(11), C7-Gd-C20 148.44(13), C7-Gd-C33 104.93(13), C20-Gd-C33 106.55(13); **10 Nd2** Nd-N(1) 2.527(5), Nd-N(2) 2.569(4), Nd-N(3) 2.607(5), Nd-N(4) 2.541(5), Nd-N(5) 2.514(5), Nd-N(6) 2.608(5), Nd-O(1) 2.481(4), Nd-O(2) 2.477(4), O1-Nd-O2 151.34(14), C7-Nd-C20 135.91(18), C7-Nd-C33 103.82(15), C20-Nd-C33 120.19(17).

### X-ray crystallography:

Single crystals coated with viscous hydrocarbon oil were mounted on glass fibres or loops. Complexes **4** were measured on a “Bruker APEX-II CCD” diffractometer equipped with graphite-monochromated Mo- $K_{\alpha}$  radiation ( $\lambda = 0.71073 \text{ \AA}$ ) at 123 K, mounted on a fibre loop in crystallography oil. Absorption corrections were completed using Apex II program suite using SADABS.<sup>1</sup> Complexes **1**, **3**, **9**, **12** and **18a** were measured on a Rigaku SynergyS diffractometer. The SynergyS operated using microsource Mo- $K_{\alpha}$  radiation ( $\lambda = 0.71073 \text{ \AA}$ ) at 123 K. Data processing was conducted using CrysAlisPro.55 software suite.<sup>2</sup> Others (**2**, **5**, **6**, **7**, **8**, **10**, **13-19**, **17a** and **20**) were measured at the Australian Synchrotron on the MX1 beamline, data integration was completed using Blue-ice<sup>3</sup> and XDS<sup>4</sup> software programs. Structural solutions were obtained by either direct methods<sup>5</sup> or charge flipping<sup>6</sup> methods and refined using full-matrix least-squares methods against  $F^2$  using SHELX2018,<sup>7</sup> in conjunction with the X-Seed<sup>8</sup> or Olex2<sup>6</sup> graphical user interface. All hydrogen atoms were placed in calculated positions using the riding model. Crystal data and refinement details are given in

Table S1 and Table S2.

## References

- [1]. Sheldrick, G. M. SADABS; University of Gottingen, Gottingen (Germany), 1996.
- [2]. CrysAlisPRO v.39. Agilent Technologies Ltd., Yarnton, Oxfordshire, England.
- [3]. T. M. McPhillips, S. E. McPhillips, H. J. Chiu, A. E. Cohen, A. M. Deacon, P. J. Ellis, E. Garman, A. Gonzalez, N. K. Sauter, R. P. Phizackerley, S. M. Soltis, J. P. Kuhn, *J. Synchrotron Radiat.* 2002, 9, 401-406.
- [4]. W. Kabsch, *J. Appl. Crystallogr.* 1993, 26, 795.
- [5]. G. M. Sheldrick, *Acta Crystallogr. Sect. A.* 2008, 64, 112-122.
- [6]. O. V. Dolomanov, L. J. Bourhis, R. J. Gildea, J. A. K. Howard, H. Puschmann, *J. Appl. Crystallogr.*, 2009, 42, 339-341.
- [7]. G. M. Sheldrick, *Acta Cryst.* 2015, C71, 3-8.
- [8]. L. J. Barbour, *J. Supramol. Chem.*, 2001, 1, 189-191.

**Table S1.** Crystal data and structural refinement for lanthanoids complexes **1-13**

|                                                    | <b>1</b>                                                                                       | <b>2</b>                                                                         | <b>3</b>                                                           | <b>4</b>                                                                                         | <b>5</b>                                                           | <b>6</b>                                                           |
|----------------------------------------------------|------------------------------------------------------------------------------------------------|----------------------------------------------------------------------------------|--------------------------------------------------------------------|--------------------------------------------------------------------------------------------------|--------------------------------------------------------------------|--------------------------------------------------------------------|
|                                                    | Lu(DFForm) <sub>3</sub> (thf)]·1.5th                                                           | [Yb(DFForm) <sub>3</sub> (thf)]·thf                                              | [Tm(DFForm) <sub>3</sub> (thf)]                                    | [Er(DFForm) <sub>3</sub> (thf)]·0.25thf                                                          | [Ho(DFForm) <sub>3</sub> (thf)]                                    | [Dy(DFForm) <sub>3</sub> (thf)]                                    |
| Formula                                            | C <sub>98</sub> H <sub>82</sub> F <sub>24</sub> Lu <sub>2</sub> N <sub>12</sub> O <sub>5</sub> | C <sub>47</sub> H <sub>37</sub> N <sub>6</sub> O <sub>2</sub> F <sub>12</sub> Yb | C <sub>43</sub> H <sub>29</sub> F <sub>12</sub> N <sub>6</sub> OTm | C <sub>176</sub> H <sub>124</sub> Er <sub>4</sub> F <sub>48</sub> N <sub>24</sub> O <sub>5</sub> | C <sub>43</sub> H <sub>29</sub> F <sub>12</sub> HoN <sub>6</sub> O | C <sub>43</sub> H <sub>29</sub> DyF <sub>12</sub> N <sub>6</sub> O |
| <i>M<sub>r</sub></i>                               | 2313.69                                                                                        | 1118.86                                                                          | 1042.65                                                            | 4236.02                                                                                          | 1038.65                                                            | 1036.22                                                            |
| Space group                                        | <b>P-1</b>                                                                                     | <b>P-1</b>                                                                       | <b>P2<sub>1</sub>/c</b>                                            | <b>P-1</b>                                                                                       | <b>P2<sub>1</sub>/c</b>                                            | <b>P2<sub>1</sub>/c</b>                                            |
| <i>a</i> (Å)                                       | 10.6678 (1)                                                                                    | 10.075 (2)                                                                       | 12.7928 (3)                                                        | 14.4237 (10)                                                                                     | 12.763 (3)                                                         | 12.807 (3)                                                         |
| <i>b</i> (Å)                                       | 11.6671 (1)                                                                                    | 11.999 (2)                                                                       | 15.9417 (3)                                                        | 16.3753 (12)                                                                                     | 15.850 (2)                                                         | 15.953 (3)                                                         |
| <i>c</i> (Å)                                       | 19.4498 (2)                                                                                    | 20.207 (4)                                                                       | 19.8550 (4)                                                        | 19.3779 (14)                                                                                     | 19.836 (4)                                                         | 19.959 (4)                                                         |
| <i>α</i> (°)                                       | 82.422(1)                                                                                      | 84.61(3)                                                                         | 90                                                                 | 69.357(2)                                                                                        | 90                                                                 | 90                                                                 |
| <i>β</i> (°)                                       | 77.196(1)                                                                                      | 82.90(3)                                                                         | 99.849 (2)                                                         | 85.193(3)                                                                                        | 99.86 (3)                                                          | 100.06 (3)                                                         |
| <i>γ</i> (°)                                       | 88.771(1)                                                                                      | 66.73(3)                                                                         | 90                                                                 | 69.548(2)                                                                                        | 90                                                                 | 90                                                                 |
| <i>V</i> (Å <sup>3</sup> )                         | 2339.69(4)                                                                                     | 2224.2(9)                                                                        | 3989.53(15)                                                        | 4009.0(5)                                                                                        | 3953.4(14)                                                         | 4015.1(14)                                                         |
| <i>Z</i>                                           | 1                                                                                              | 2                                                                                | 4                                                                  | 1                                                                                                | 4                                                                  | 4                                                                  |
| <i>ρ</i> <sub>calc</sub> , g cm <sup>-3</sup>      | 1.642                                                                                          | 1.671                                                                            | 1.736                                                              | 1.755                                                                                            | 1.745                                                              | 1.714                                                              |
| <i>μ</i> , mm <sup>-1</sup>                        | 2.206                                                                                          | 2.200                                                                            | 2.324                                                              | 2.195                                                                                            | 2.103                                                              | 1.961                                                              |
| <i>N<sub>τ</sub></i>                               | 49954                                                                                          | 54985                                                                            | 43707                                                              | 65596                                                                                            | 28356                                                              | 53465                                                              |
| <i>N</i> ( <i>R<sub>int</sub></i> )                | 9557(0.0503)                                                                                   | 8997(0.0642)                                                                     | 8138(0.0765)                                                       | 14141(0.1182)                                                                                    | 7877(0.0854)                                                       | 8110(0.0571)                                                       |
| <i>R</i> <sub>1</sub> ( <i>I</i> > 2σ( <i>I</i> )) | 0.0241                                                                                         | 0.0429                                                                           | 0.0362                                                             | 0.0439                                                                                           | 0.0464                                                             | 0.0329                                                             |
| <i>wR</i> <sub>2</sub> (all data)                  | 0.0574                                                                                         | 0.1138                                                                           | 0.0969                                                             | 0.1208                                                                                           | 0.1165                                                             | 0.0866                                                             |
| GOF                                                | 1.057                                                                                          | 1.079                                                                            | 1.033                                                              | 1.046                                                                                            | 0.996                                                              | 1.043                                                              |



|                                                    | <b>7</b>                                                                         | <b>8</b>                                                                        | <b>9</b>                                                                         | <b>10</b>                                                                       | <b>12</b>                                                        | <b>13</b>                                           |
|----------------------------------------------------|----------------------------------------------------------------------------------|---------------------------------------------------------------------------------|----------------------------------------------------------------------------------|---------------------------------------------------------------------------------|------------------------------------------------------------------|-----------------------------------------------------|
|                                                    | [Tb(DFForm) <sub>3</sub> (thf) <sub>2</sub> ]·thf                                | [Gd(DFForm) <sub>3</sub> (thf) <sub>2</sub> ]·thf                               | [Sm(DFForm) <sub>3</sub> (thf) <sub>2</sub> ]·2thf                               | [Nd(DFForm) <sub>3</sub> (thf) <sub>2</sub> ]·thf                               | [Nd(DippForm) <sub>2</sub> F(thf) <sub>2</sub> ]                 | [Er(DippForm) <sub>2</sub> F(thf)]                  |
| Formula                                            | C <sub>51</sub> H <sub>45</sub> F <sub>12</sub> N <sub>6</sub> O <sub>3</sub> Tb | C <sub>51</sub> H <sub>45</sub> F <sub>12</sub> GdN <sub>6</sub> O <sub>3</sub> | C <sub>55</sub> H <sub>53</sub> F <sub>12</sub> N <sub>6</sub> O <sub>4</sub> Sm | C <sub>51</sub> H <sub>45</sub> F <sub>12</sub> N <sub>6</sub> NdO <sub>3</sub> | C <sub>58</sub> H <sub>86</sub> FN <sub>4</sub> NdO <sub>2</sub> | C <sub>54</sub> H <sub>78</sub> ErFN <sub>4</sub> O |
| <i>M<sub>r</sub></i>                               | 1176.85                                                                          | 1175.18                                                                         | 1240.38                                                                          | 1162.17                                                                         | 1034.54                                                          | 985.46                                              |
| Space group                                        | <b>P-1</b>                                                                       | <b>P-1</b>                                                                      | <b>P2<sub>1</sub>2<sub>1</sub>2<sub>1</sub></b>                                  | <b>P-1</b>                                                                      | <b>P2<sub>1</sub>/n</b>                                          | <b>P2<sub>1</sub>/n</b>                             |
| <i>a</i> (Å)                                       | 13.510 (3)                                                                       | 13.550 (3)                                                                      | 15.0846 (2)                                                                      | 13.580 (3)                                                                      | 10.5982 (2)                                                      | 20.470 (4)                                          |
| <i>b</i> (Å)                                       | 18.030 (4)                                                                       | 18.070 (4)                                                                      | 17.6395 (3)                                                                      | 18.100 (4)                                                                      | 22.8059 (4)                                                      | 12.133 (2)                                          |
| <i>c</i> (Å)                                       | 22.570 (5)                                                                       | 22.500 (5)                                                                      | 19.6763 (3)                                                                      | 22.510 (5)                                                                      | 22.1814 (4)                                                      | 21.508 (4)                                          |
| <i>α</i> (°)                                       | 85.87(3)                                                                         | 85.81(3)                                                                        | 90                                                                               | 85.52(3)                                                                        | 90                                                               | 90                                                  |
| <i>β</i> (°)                                       | 75.52(3)                                                                         | 75.52(3)                                                                        | 90                                                                               | 75.40(3)                                                                        | 95.019(2)                                                        | 110.27(3)                                           |
| <i>γ</i> (°)                                       | 69.45(3)                                                                         | 69.65(3)                                                                        | 90                                                                               | 69.60(3)                                                                        | 90                                                               | 90                                                  |
| <i>V</i> (Å <sup>3</sup> )                         | 4983(2)                                                                          | 5001(2)                                                                         | 5235.56(14)                                                                      | 5018(2)                                                                         | 5340.72(17)                                                      | 5011(2)                                             |
| <i>Z</i>                                           | 4                                                                                | 4                                                                               | 4                                                                                | 4                                                                               | 4                                                                | 4                                                   |
| <i>ρ</i> <sub>calc</sub> , g cm <sup>-3</sup>      | 1.569                                                                            | 1.561                                                                           | 1.574                                                                            | 1.538                                                                           | 1.287                                                            | 1.306                                               |
| <i>μ</i> , mm <sup>-1</sup>                        | 1.513                                                                            | 1.420                                                                           | 1.217                                                                            | 1.128                                                                           | 1.020                                                            | 1.719                                               |
| <i>N<sub>τ</sub></i>                               | 104447                                                                           | 105125                                                                          | 41672                                                                            | 104237                                                                          | 61941                                                            | 60702                                               |
| <i>N</i> ( <i>R<sub>m</sub></i> )                  | 19931(0.0529)                                                                    | 20032(0.0641)                                                                   | 10615(0.0434)                                                                    | 20050(0.0896)                                                                   | 13754(0.0436)                                                    | 9826(0.0276)                                        |
| <i>R</i> <sub>1</sub> ( <i>I</i> > 2σ( <i>I</i> )) | 0.0423                                                                           | 0.0462                                                                          | 0.0291                                                                           | 0.0557                                                                          | 0.0345                                                           | 0.0268                                              |
| <i>wR</i> <sub>2</sub> (all data)                  | 0.1189                                                                           | 0.1301                                                                          | 0.0704                                                                           | 0.1612                                                                          | 0.0830                                                           | 0.0696                                              |
| GOF                                                | 1.054                                                                            | 1.042                                                                           | 1.035                                                                            | 1.025                                                                           | 1.032                                                            | 1.054                                               |

|                                                    | <b>14</b>                                                                                    | <b>15</b>                                                                                                     | <b>16</b>                                                                                                     | <b>17a</b>                                                         | <b>17</b>                                                                                                     |
|----------------------------------------------------|----------------------------------------------------------------------------------------------|---------------------------------------------------------------------------------------------------------------|---------------------------------------------------------------------------------------------------------------|--------------------------------------------------------------------|---------------------------------------------------------------------------------------------------------------|
|                                                    | [Ag <sub>2</sub> (DFForm) <sub>2</sub> ] <sub>2</sub> ·3thf                                  | [Lu(DFForm) <sub>2</sub> (py)(thf)I]                                                                          | {[Tm(DFForm) <sub>2</sub> (py)(thf)I]·1.5thf} <sub>2</sub>                                                    | [Er(DFForm) <sub>3</sub> (py)]·thf                                 | {[Er(DFForm) <sub>2</sub> (py)(thf)I]·1.5thf} <sub>2</sub>                                                    |
| Formula                                            | C <sub>38</sub> H <sub>38</sub> Ag <sub>2</sub> F <sub>8</sub> N <sub>4</sub> O <sub>3</sub> | C <sub>82</sub> H <sub>78</sub> F <sub>16</sub> I <sub>2</sub> Lu <sub>2</sub> N <sub>10</sub> O <sub>5</sub> | C <sub>82</sub> H <sub>78</sub> F <sub>16</sub> I <sub>2</sub> N <sub>10</sub> O <sub>5</sub> Tm <sub>2</sub> | C <sub>48</sub> H <sub>34</sub> ErF <sub>12</sub> N <sub>7</sub> O | C <sub>82</sub> H <sub>78</sub> Er <sub>2</sub> F <sub>16</sub> I <sub>2</sub> N <sub>10</sub> O <sub>5</sub> |
| <i>M<sub>r</sub></i>                               | 966.46                                                                                       | 2191.28                                                                                                       | 2179.20                                                                                                       | 1120.08                                                            | 2175.86                                                                                                       |
| Space group                                        | <b>I2/m</b>                                                                                  | <b>C2/c</b>                                                                                                   | <b>C2/c</b>                                                                                                   | <b>P-1</b>                                                         | <b>C2/c</b>                                                                                                   |
| <i>a</i> (Å)                                       | 8.8317(2)                                                                                    | 26.598(5)                                                                                                     | 26.332(5)                                                                                                     | 11.510(2)                                                          | 26.488(5)                                                                                                     |
| <i>b</i> (Å)                                       | 17.4428(4)                                                                                   | 20.753(4)                                                                                                     | 20.789(4)                                                                                                     | 12.020(2)                                                          | 20.872(4)                                                                                                     |
| <i>c</i> (Å)                                       | 12.0639(3)                                                                                   | 17.735(4)                                                                                                     | 17.983(4)                                                                                                     | 16.940(3)                                                          | 17.977(4)                                                                                                     |
| <i>α</i> (°)                                       | 90                                                                                           | 90                                                                                                            | 90                                                                                                            | 92.65(3)                                                           | 90                                                                                                            |
| <i>β</i> (°)                                       | 100.322(3)                                                                                   | 123.82(3)                                                                                                     | 124.30(3)                                                                                                     | 96.67(3)                                                           | 124.22(3)                                                                                                     |
| <i>γ</i> (°)                                       | 90                                                                                           | 90                                                                                                            | 90                                                                                                            | 107.52(3)                                                          | 90                                                                                                            |
| <i>V</i> (Å <sup>3</sup> )                         | 1828.36(8)                                                                                   | 8133(4)                                                                                                       | 8132(4)                                                                                                       | 2211.7(9)                                                          | 8218(4)                                                                                                       |
| <i>Z</i>                                           | 2                                                                                            | 4                                                                                                             | 4                                                                                                             | 2                                                                  | 4                                                                                                             |
| <i>ρ</i> <sub>calc</sub> , g cm <sup>-3</sup>      | 1.756                                                                                        | 1.790                                                                                                         | 1.780                                                                                                         | 1.682                                                              | 1.759                                                                                                         |
| <i>μ</i> , mm <sup>-1</sup>                        | 1.156                                                                                        | 3.268                                                                                                         | 3.022                                                                                                         | 1.995                                                              | 2.874                                                                                                         |
| <i>N<sub>r</sub></i>                               | 13783                                                                                        | 56724                                                                                                         | 28154                                                                                                         | 46380                                                              | 50296                                                                                                         |
| <i>N</i> ( <i>R<sub>int</sub></i> )                | 2654(0.0311)                                                                                 | 8091(0.0312)                                                                                                  | 8017(0.0490)                                                                                                  | 8866(0.0284)                                                       | 7587(0.1234)                                                                                                  |
| <i>R</i> <sub>1</sub> ( <i>I</i> > 2σ( <i>I</i> )) | 0.0231                                                                                       | 0.0326                                                                                                        | 0.0590                                                                                                        | 0.0242                                                             | 0.0778                                                                                                        |
| <i>wR</i> <sub>2</sub> (all data)                  | 0.0548                                                                                       | 0.0816                                                                                                        | 0.1615                                                                                                        | 0.0633                                                             | 0.2351                                                                                                        |
| GOF                                                | 1.057                                                                                        | 1.080                                                                                                         | 1.072                                                                                                         | 1.102                                                              | 1.097                                                                                                         |

|                                                    | <b>18a</b>                                                        | <b>18</b>                                                         | <b>19</b>                                                        | <b>20</b>                                                                     |
|----------------------------------------------------|-------------------------------------------------------------------|-------------------------------------------------------------------|------------------------------------------------------------------|-------------------------------------------------------------------------------|
|                                                    | [Tb(DFForm) <sub>3</sub> (py)]·2PhMe                              | [Tb(DFForm) <sub>2</sub> (py) <sub>2</sub> I]·PhMe                | [Gd(DFForm) <sub>2</sub> (py) <sub>2</sub> I]·PhMe               | [Yb <sub>2</sub> (DippForm) <sub>2</sub> O <sub>4</sub> (py) <sub>4</sub> ]   |
| Formula                                            | C <sub>58</sub> H <sub>42</sub> F <sub>12</sub> N <sub>7</sub> Tb | C <sub>43</sub> H <sub>32</sub> F <sub>8</sub> IN <sub>6</sub> Tb | C <sub>43</sub> H <sub>32</sub> F <sub>8</sub> GdIN <sub>6</sub> | C <sub>70</sub> H <sub>90</sub> N <sub>8</sub> O <sub>4</sub> Yb <sub>2</sub> |
| <i>M<sub>r</sub></i>                               | 1223.90                                                           | 1070.56                                                           | 1068.89                                                          | 1453.59                                                                       |
| Space group                                        | <b>P-1</b>                                                        | <b>P2/n</b>                                                       | <b>P2/n</b>                                                      | <b>P2<sub>1</sub>/n</b>                                                       |
| <i>a</i> (Å)                                       | 11.2093(1)                                                        | 11.232 (2)                                                        | 11.166(2)                                                        | 12.250(3)                                                                     |
| <i>b</i> (Å)                                       | 11.5339(1)                                                        | 13.487 (3)                                                        | 13.357(3)                                                        | 15.840(3)                                                                     |
| <i>c</i> (Å)                                       | 20.2881(2)                                                        | 13.952(3)                                                         | 13.945(3)                                                        | 17.389(4)                                                                     |
| <i>α</i> (°)                                       | 90.183(1)                                                         | 90                                                                | 90                                                               | 90                                                                            |
| <i>β</i> (°)                                       | 103.137(1)                                                        | 96.14(3)                                                          | 96.10(3)                                                         | 100.37(3)                                                                     |
| <i>γ</i> (°)                                       | 92.010(1)                                                         | 90                                                                | 90                                                               | 90                                                                            |
| <i>V</i> (Å <sup>3</sup> )                         | 2552.60(4)                                                        | 2101.4(7)                                                         | 2068.0(7)                                                        | 3319.1(12)                                                                    |
| <i>Z</i>                                           | 2                                                                 | 2                                                                 | 2                                                                | 2                                                                             |
| <i>ρ</i> <sub>calc</sub> , g cm <sup>-3</sup>      | 1.592                                                             | 1.692                                                             | 1.717                                                            | 1.454                                                                         |
| <i>μ</i> , mm <sup>-1</sup>                        | 1.477                                                             | 2.491                                                             | 2.425                                                            | 2.853                                                                         |
| <i>N<sub>τ</sub></i>                               | 48554                                                             | 27124                                                             | 24031                                                            | 45312                                                                         |
| <i>N</i> ( <i>R</i> <sub>int</sub> )               | 10429(0.1385)                                                     | 3976(0.1124)                                                      | 4222(0.0369)                                                     | 6495(0.0879)                                                                  |
| <i>R</i> <sub>1</sub> ( <i>I</i> > 2σ( <i>I</i> )) | 0.0399                                                            | 0.0506                                                            | 0.0294                                                           | 0.0441                                                                        |
| <i>wR</i> <sub>2</sub> (all data)                  | 0.1012                                                            | 0.1250                                                            | 0.0760                                                           | 0.1141                                                                        |
| GOF                                                | 1.020                                                             | 1.100                                                             | 1.113                                                            | 1.057                                                                         |
